# Supplementary material for: Proimmunogenic impact of MEK inhibition synergizes with agonist anti-CD40 immunostimulatory antibodies in tumor therapy
Source: PubMed Central journal article supplement (PMC7195409; doi:10.1038/s41467-020-15979-2), 2020-05-01
Supplement: 41467_2020_15979_MOESM3_ESM.pdf [file 41467_2020_15979_MOESM3_ESM.pdf]

## **Description of Additional Supplementary Files**

File Name: Supplementary Data 1

Description: Non-synonymous mutations in human PDA cell lines and mouse tumor models as determined by whole exome sequencing.
